# Supplementary material for: Electrochemical and chemical insertion/deinsertion of magnesium in spinel-type MgMn2O4 and lambda-MnO2 for both aqueous and non-aqueous magnesium-ion batteries
Source: Royal Society of Chemistry journal article supplement (doi:10.1039/c5ce01436k), 2015-01-01
Supplement: c5ce01436k1.pdf [file c5ce01436k1.pdf]

### Electronic Supplementary Information

M. Cabello, R. Alcántara, F. Nacimiento, G. Ortiz, P. Lavela and J. L. Tirado

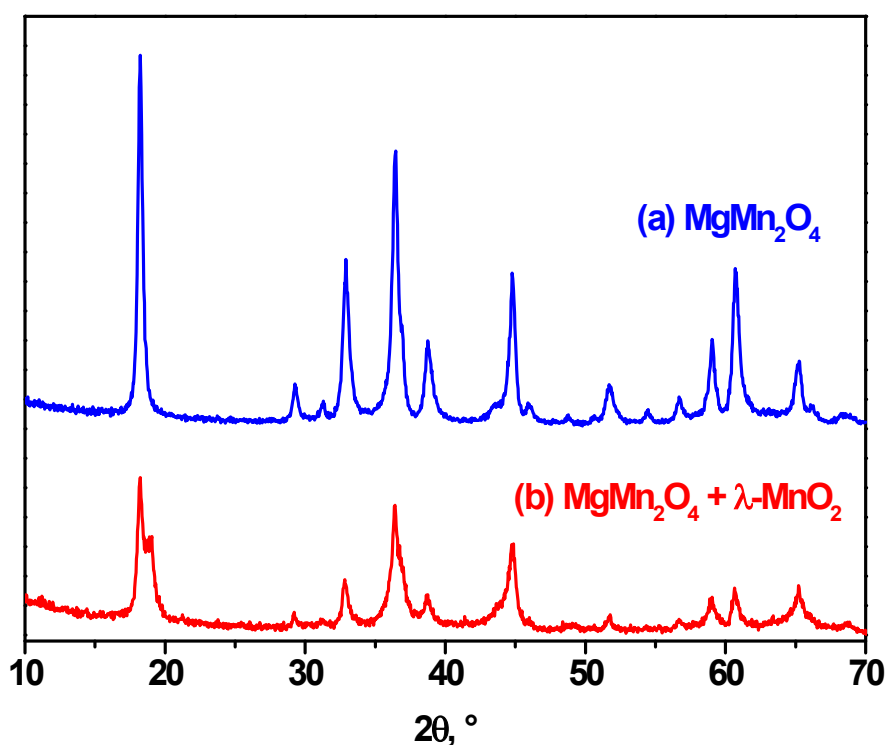

**Fig S 1** X-ray diffraction patterns for tetragonal  $\text{MgMn}_2\text{O}_4$  prepared at  $550^\circ\text{C}$  before (a) and after treatment with nitric acid at pH 2 during 50 minutes. The transformation into cubic manganese dioxide ( $\lambda\text{-MnO}_2$ ) is only partial and the two phases coexist in (b). For the pristine sample in (a), the parameters of the tetragonal cell are:  $a=b=5.716(3)$  Å and  $c=9.2867(5)$  Å. The cell parameters obtained from (b) are the following: for the tetragonal phase  $a=b=5.719(5)$  Å and  $c=9.297(2)$  Å, and for the cubic phase  $a=8.1(1)$  Å. This figure can be used to see comparatively how the acid treatment more easily transforms  $\text{MgMn}_2\text{O}_4$  prepared at  $400^\circ\text{C}$  into  $\lambda\text{-MnO}_2$ . After acid treatment, the extraction of magnesium does not reduce the tetragonal distortion of the cell in the remaining  $\text{MgMn}_2\text{O}_4$  phase. The most probably is that the texture of  $\text{MgMn}_2\text{O}_4\text{-}550^\circ\text{C}$  with blocked pores hinders the acid attack and the demagnesiumation is limited.

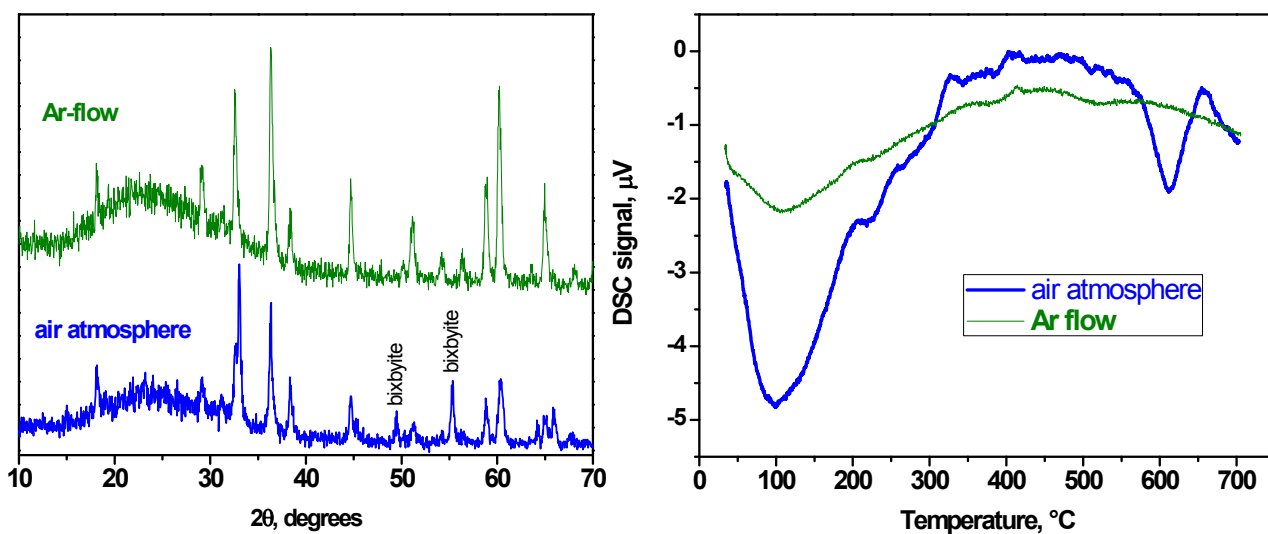

**Fig S 2** XRD patterns of samples recuperated from DSC experiments (up to 700°C) that were carried out in air atmosphere and under Ar-flow starting from  $\lambda$ -MnO<sub>2</sub>. Under Ar-flow the endothermal peak at 614°C is not observed and bixbyite  $\alpha$ -Mn<sub>2</sub>O<sub>3</sub> (JCPDS:41-1442) is not formed. Two Bragg reflections of the bixbyite phase are marked.

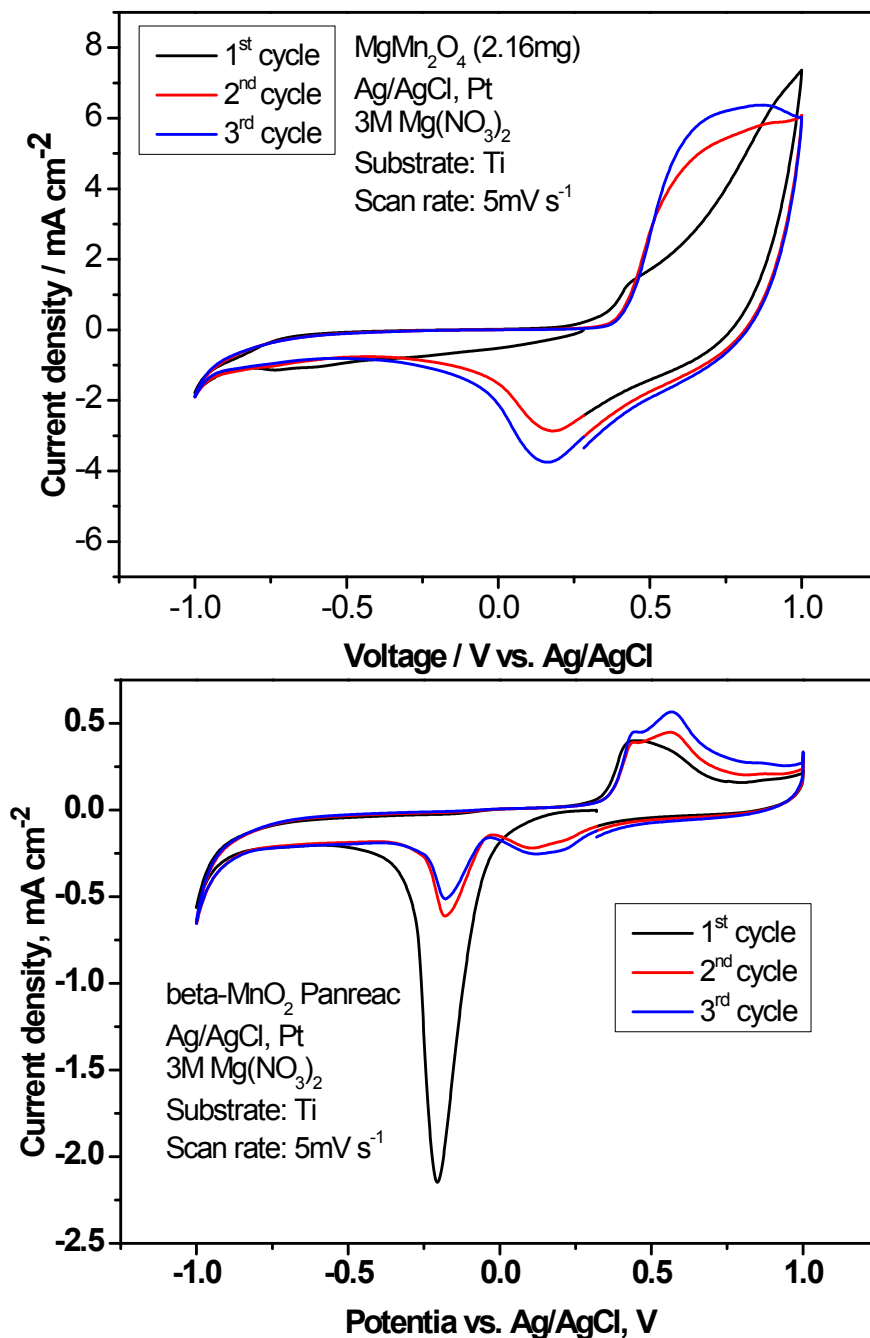

**Fig S 3** Cyclic voltammetry results for 400°C-MgMn<sub>2</sub>O<sub>4</sub> in aqueous solution. For the sake of comparison the voltammogram of pyrolusite  $\beta$ -MnO<sub>2</sub> (commercial from Panreac) is also shown. Reference electrode: Ag/AgCl. Counter electrode: Pt. Electrolyte: 3M Mg(NO<sub>3</sub>)<sub>2</sub>. Scan rate: 5mV s<sup>-1</sup>. A reversible anodic/cathodic peak is observed, which is ascribed to the faradic reaction involving Mn<sup>3+</sup>/Mn<sup>4+</sup>. Pyrolusite phase exhibits more irreversibility and more polarization between charge and discharge.

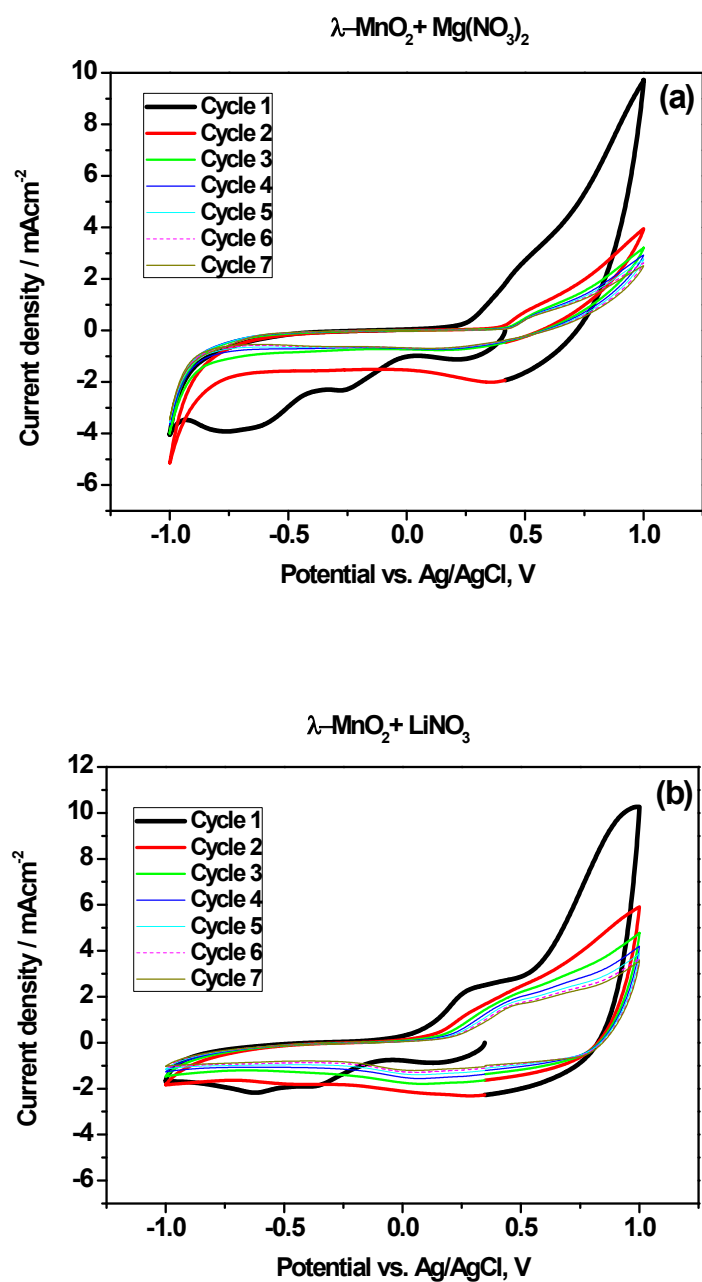

**Fig S 4** Voltammetry results for  $\lambda\text{-MnO}_2$  (prepared from  $\text{MgMn}_2\text{O}_4$ ) in magnesium (a) and lithium (b) nitrate aqueous electrolyte. The corresponding XRD patterns of the cycled electrodes are shown in Fig. 8.

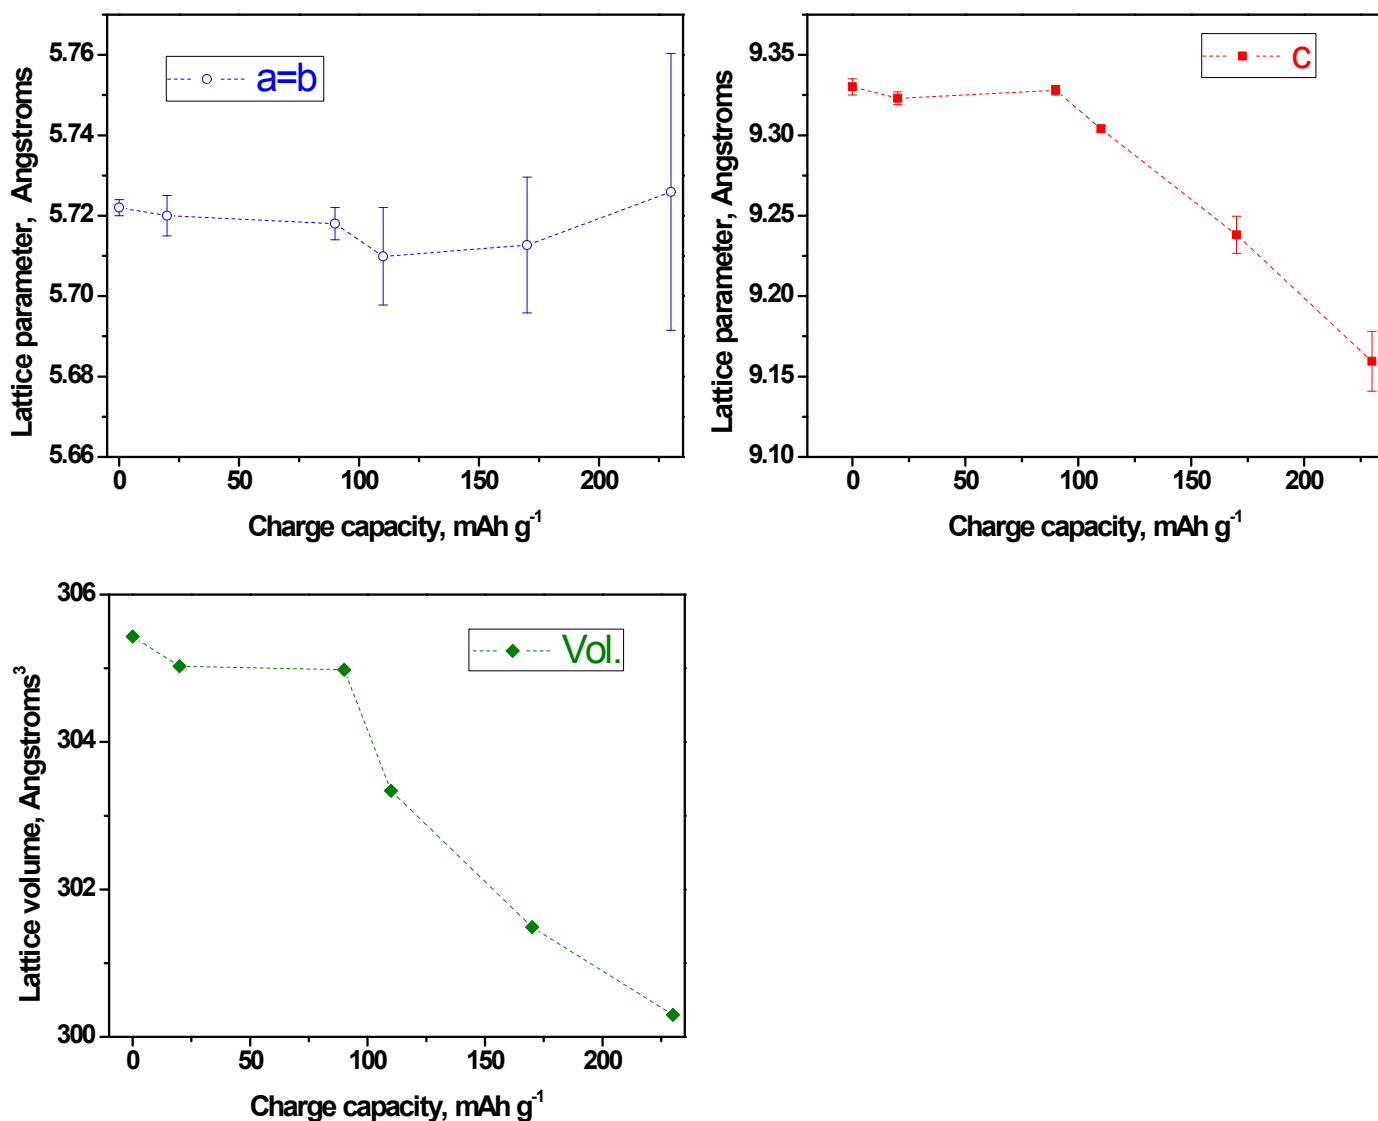

**Figure S5** Lattice cell parameters ( $a=b$  and  $c$ ) and lattice volume as a function of charge capacity for  $\text{MgMn}_2\text{O}_4$ -800°C in non-aqueous magnesium-ion battery. Electrolyte solution: 0.5 M  $\text{Mg}(\text{ClO}_4)_2$  in EC:DEC (50:50). The tetragonal structure is preserved. The lattice parameters were obtained from the ex-situ XRD of  $\text{MgMn}_2\text{O}_4$  (positive) electrode recuperated from magnesium-ion batteries. The negative electrode was commercial  $\text{V}_2\text{O}_5$ . The electrodes recuperated from the electrochemical cells in the dry box and its reaction with air atmosphere during XRD recording was avoided by covering the sample with a protective plastic film.

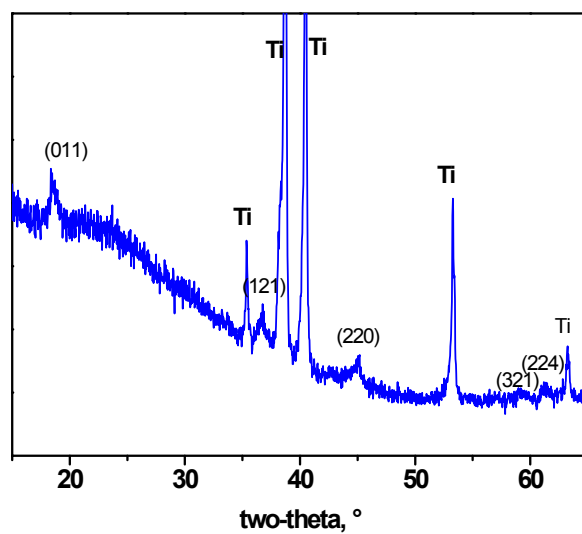

**Figure S6** *Ex-situ* XRD for  $\text{MgMn}_2\text{O}_4$ -400°C electrode recuperated from the first charge in non-aqueous magnesium-ion battery. Electrolyte solution: 0.5 M  $\text{Mg}(\text{ClO}_4)_2$  in EC:DEC (50:50). It is observed that the tetragonal structure (s.g.  $I4_1/amd$ ) is preserved. The reflections of Ti substrate are marked.
